# Supplementary material for: Familiality of Psychiatric Disorders and Risk of Postpartum Psychiatric Episodes: A Population-Based Cohort Study
Source: Atypon-hosted journal article supplement (doi:10.1176/appi.ajp.2018.17111184), 2018-05-07
Supplement: appi.ajp.2018.17111184.ds001.pdf [file appi.ajp.2018.17111184.ds001.pdf]

 


Psychiatry Online
