# Supplementary material for: Familiality of Psychiatric Disorders and Risk of Postpartum Psychiatric Episodes: A Population-Based Cohort Study
Source: Atypon-hosted journal article supplement (doi:10.1176/appi.ajp.2018.17111184), 2018-05-07
Supplement: appi.ajp.2018.17111184.ds001.pdf [file appi.ajp.2018.17111184.ds001.pdf]

Data Supplement for Bauer et al., Familiarity of Psychiatric Disorders and Risk of Postpartum Psychiatric Episodes: A Population-Based Cohort Study. Am J Psychiatry (doi: 10.1176/appi.ajp.2018.17111184)

**Table S1.** Familial risk of psychiatric disorders within 3 months postpartum, by type of disorder and relationship of the proband mother's relative

**Table S2.** Familial risk of psychiatric disorders within 12 months postpartum, by type of disorder and relationship of the proband mother's relative

**Figure S1.** Definition of relatives according to proband new mothers

**TABLE S1.** Familial risk of psychiatric disorders within 3 months postpartum, by type of disorder and relationship of the proband mother's relative.

| Relationship to proband new mother                                    | Relatives with any psychiatric vs. no psychiatric disorders |           | Relatives with schizophrenia vs. no schizophrenia |           | Relatives with bipolar disorder vs. no bipolar disorder |            | Relatives with unipolar disorder vs. no unipolar disorder |           | Relatives with other mood disorder vs. no other mood disorder |            | Relatives with other psychiatric disorders vs. no other psychiatric disorders |           |
|-----------------------------------------------------------------------|-------------------------------------------------------------|-----------|---------------------------------------------------|-----------|---------------------------------------------------------|------------|-----------------------------------------------------------|-----------|---------------------------------------------------------------|------------|-------------------------------------------------------------------------------|-----------|
|                                                                       | HR                                                          | 95% CI    | HR                                                | 95% CI    | HR                                                      | 95% CI     | HR                                                        | 95% CI    | HR                                                            | 95% CI     | HR                                                                            | 95% CI    |
| <b>All proband mothers <sup>a</sup></b>                               |                                                             |           |                                                   |           |                                                         |            |                                                           |           |                                                               |            |                                                                               |           |
| Mother                                                                | 1.48                                                        | 1.19–1.84 | 1.50                                              | 1.02–2.19 | 3.67                                                    | 1.97–6.83  | 1.65                                                      | 1.19–2.30 | 1.56                                                          | 0.50–4.83  | 0.77                                                                          | 0.44–1.33 |
| Father                                                                | 1.62                                                        | 1.27–2.08 | 1.74                                              | 1.15–2.62 | 3.43                                                    | 1.54–7.64  | 1.77                                                      | 1.20–2.61 | 2.72                                                          | 1.22–6.06  | 0.52                                                                          | 0.22–1.26 |
| Any first-degree relative                                             | 1.52                                                        | 1.29–1.80 | 1.55                                              | 1.17–2.04 | 3.44                                                    | 2.10–5.63  | 1.73                                                      | 1.34–2.22 | 2.10                                                          | 1.09–4.04  | 0.81                                                                          | 0.56–1.16 |
| Any second-degree relative                                            | 1.11                                                        | 0.94–1.31 | 0.97                                              | 0.74–1.28 | 1.42                                                    | 0.78–2.58  | 1.04                                                      | 0.81–1.32 | 1.25                                                          | 0.60–2.64  | 1.05                                                                          | 0.80–1.36 |
| Any third-degree relative                                             | 1.09                                                        | 0.80–1.48 | 2.33                                              | 1.21–4.50 | -                                                       | -          | 1.12                                                      | 0.42–3.02 | -                                                             | -          | 0.98                                                                          | 0.69–1.37 |
| Any first-deg female relative                                         | 1.39                                                        | 1.14–1.70 | 1.37                                              | 0.95–1.97 | 3.42                                                    | 1.84–6.37  | 1.62                                                      | 1.17–2.24 | 1.44                                                          | 0.46–4.46  | 0.90                                                                          | 0.61–1.32 |
| Any first-deg male realtive                                           | 1.45                                                        | 1.16–1.81 | 1.58                                              | 1.07–2.33 | 3.08                                                    | 1.38–6.88  | 1.77                                                      | 1.22–2.55 | 2.53                                                          | 1.13–5.63  | 0.82                                                                          | 0.52–1.28 |
| <b>Proband mothers with no prior psychiatric history <sup>b</sup></b> |                                                             |           |                                                   |           |                                                         |            |                                                           |           |                                                               |            |                                                                               |           |
| Mother                                                                | 1.79                                                        | 1.31–2.45 | 1.89                                              | 1.11–3.20 | 4.99                                                    | 2.24–11.13 | 1.62                                                      | 0.97–2.69 | 4.19                                                          | 1.35–13.01 | 0.75                                                                          | 0.28–2.02 |
| Father                                                                | 1.81                                                        | 1.27–2.58 | 0.85                                              | 0.35–2.05 | 4.32                                                    | 1.62–11.53 | 2.65                                                      | 1.66–4.22 | 4.17                                                          | 1.56–11.15 | 0.29                                                                          | 0.04–2.10 |
| Any first-degree relative                                             | 1.75                                                        | 1.38–2.21 | 1.47                                              | 0.95–2.26 | 4.54                                                    | 2.44–8.47  | 2.16                                                      | 1.54–3.03 | 4.06                                                          | 1.93–8.53  | 0.59                                                                          | 0.29–1.20 |
| Any second-degree relative                                            | 1.26                                                        | 1.00–1.58 | 1.18                                              | 0.81–1.70 | 1.66                                                    | 0.79–3.50  | 1.07                                                      | 0.77–1.51 | 1.19                                                          | 0.38–3.70  | 1.31                                                                          | 0.90–1.90 |
| Any third-degree relative                                             | 1.17                                                        | 0.76–1.82 | 2.89                                              | 1.19–6.98 | -                                                       | -          | 0.65                                                      | 0.09–4.66 | -                                                             | -          | 1.04                                                                          | 0.63–1.70 |
| Any first-deg female relative                                         | 1.61                                                        | 1.20–2.16 | 1.84                                              | 1.12–3.02 | 4.65                                                    | 2.08–10.38 | 1.74                                                      | 1.08–2.81 | 3.86                                                          | 1.24–12.00 | 0.68                                                                          | 0.32–1.44 |
| Any first-deg male realtive                                           | 1.66                                                        | 1.21–2.29 | 0.97                                              | 0.46–2.05 | 3.96                                                    | 1.48–10.57 | 2.87                                                      | 1.86–4.43 | 3.91                                                          | 1.47–10.45 | 0.47                                                                          | 0.18–1.26 |
| <b>Proband mothers with prior psychiatric history <sup>b</sup></b>    |                                                             |           |                                                   |           |                                                         |            |                                                           |           |                                                               |            |                                                                               |           |
| Mother                                                                | 1.32                                                        | 0.97–1.78 | 1.20                                              | 0.70–2.09 | 2.60                                                    | 0.97–6.95  | 1.67                                                      | 1.08–2.58 | -                                                             | -          | 0.88                                                                          | 0.45–1.72 |
| Father                                                                | 1.51                                                        | 1.07–2.14 | 2.43                                              | 1.52–3.89 | 2.29                                                    | 0.57–9.20  | 1.03                                                      | 0.51–2.06 | 1.51                                                          | 0.38–6.05  | 0.73                                                                          | 0.27–1.95 |
| Any first-degree relative                                             | 1.40                                                        | 1.11–1.76 | 1.59                                              | 1.11–2.29 | 2.40                                                    | 1.07–5.37  | 1.39                                                      | 0.96–2.03 | 0.75                                                          | 0.19–3.01  | 1.05                                                                          | 0.69–1.60 |
| Any second-degree relative                                            | 1.01                                                        | 0.79–1.29 | 0.80                                              | 0.53–1.22 | 1.17                                                    | 0.43–3.12  | 1.04                                                      | 0.74–1.47 | 1.37                                                          | 0.51–3.68  | 0.96                                                                          | 0.66–1.40 |
| Any third-degree relative                                             | 1.13                                                        | 0.73–1.73 | 2.08                                              | 0.77–5.59 | -                                                       | -          | 1.68                                                      | 0.54–5.28 | -                                                             | -          | 1.01                                                                          | 0.63–1.63 |
| Any first-deg female relative                                         | 1.30                                                        | 0.99–1.71 | 1.02                                              | 0.59–1.77 | 2.45                                                    | 0.92–6.55  | 1.54                                                      | 1.00–2.39 | -                                                             | -          | 1.15                                                                          | 0.74–1.81 |
| Any first-deg male realtive                                           | 1.35                                                        | 0.99–1.84 | 2.04                                              | 1.29–3.23 | 2.07                                                    | 0.52–8.31  | 0.90                                                      | 0.45–1.80 | 1.40                                                          | 0.35–5.62  | 1.14                                                                          | 0.69–1.90 |

Figures are hazard ratios (95% confidence intervals); <sup>a</sup> adjusted for calendar year at delivery and age at delivery and stratified by previous psychiatric history of the proband mothers ; <sup>b</sup> adjusted for calendar year at delivery and age at delivery.

**TABLE S2.** Familial risk of psychiatric disorders within 12 months postpartum, by type of disorder and relationship of the proband mother's relative.

| Relationship to proband new mother                                    | Relatives with any psychiatric vs. no psychiatric disorders |           | Relatives with schizophrenia vs. no schizophrenia |           | Relatives with bipolar disorder vs. no bipolar disorder |            | Relatives with unipolar disorder vs. no unipolar disorder |           | Relatives with other mood disorder vs. no other mood disorder |            | Relatives with other psychiatric disorders vs. no other psychiatric disorders |           |
|-----------------------------------------------------------------------|-------------------------------------------------------------|-----------|---------------------------------------------------|-----------|---------------------------------------------------------|------------|-----------------------------------------------------------|-----------|---------------------------------------------------------------|------------|-------------------------------------------------------------------------------|-----------|
|                                                                       | HR                                                          | 95% CI    | HR                                                | 95% CI    | HR                                                      | 95% CI     | HR                                                        | 95% CI    | HR                                                            | 95% CI     | HR                                                                            | 95% CI    |
| <b>All proband mothers <sup>a</sup></b>                               |                                                             |           |                                                   |           |                                                         |            |                                                           |           |                                                               |            |                                                                               |           |
| Mother                                                                | 1.48                                                        | 1.30–1.69 | 1.44                                              | 1.14–1.82 | 2.38                                                    | 1.48–3.83  | 1.59                                                      | 1.30–1.95 | 2.40                                                          | 1.39–4.13  | 1.08                                                                          | 0.83–1.40 |
| Father                                                                | 1.49                                                        | 1.27–1.73 | 1.38                                              | 1.05–1.83 | 3.16                                                    | 1.87–5.34  | 1.62                                                      | 1.27–2.07 | 1.94                                                          | 1.10–3.43  | 1.01                                                                          | 0.70–1.44 |
| Any first-degree relative                                             | 1.42                                                        | 1.29–1.58 | 1.36                                              | 1.14–1.62 | 2.66                                                    | 1.88–3.77  | 1.60                                                      | 1.37–1.87 | 2.17                                                          | 1.47–3.19  | 0.98                                                                          | 0.81–1.17 |
| Any second-degree relative                                            | 1.17                                                        | 1.06–1.29 | 1.05                                              | 0.90–1.23 | 1.01                                                    | 0.67–1.52  | 1.20                                                      | 1.05–1.37 | 1.48                                                          | 1.00–2.19  | 1.22                                                                          | 1.06–1.41 |
| Any third-degree relative                                             | 1.31                                                        | 1.11–1.53 | 1.81                                              | 1.81–2.75 | 2.28                                                    | 0.32–16.17 | 1.47                                                      | 0.91–2.38 | 1.05                                                          | 0.15–7.49  | 1.23                                                                          | 1.03–1.47 |
| Any first-deg female relative                                         | 1.36                                                        | 1.20–1.53 | 1.32                                              | 1.06–1.66 | 2.36                                                    | 1.48–3.75  | 1.57                                                      | 1.29–1.92 | 2.39                                                          | 1.41–4.04  | 0.97                                                                          | 0.79–1.19 |
| Any first-deg male realtive                                           | 1.29                                                        | 1.12–1.48 | 1.24                                              | 0.95–1.62 | 3.05                                                    | 1.84–5.06  | 1.57                                                      | 1.25–1.99 | 1.97                                                          | 1.14–3.39  | 0.90                                                                          | 0.71–1.14 |
| <b>Proband mothers with no prior psychiatric history <sup>b</sup></b> |                                                             |           |                                                   |           |                                                         |            |                                                           |           |                                                               |            |                                                                               |           |
| Mother                                                                | 1.74                                                        | 1.43–2.11 | 1.72                                              | 1.22–2.42 | 3.25                                                    | 1.74–6.04  | 1.62                                                      | 1.18–2.23 | 3.13                                                          | 1.40–6.97  | 1.34                                                                          | 0.87–2.07 |
| Father                                                                | 1.79                                                        | 1.44–2.23 | 1.44                                              | 0.95–2.19 | 3.50                                                    | 1.75–7.00  | 2.23                                                      | 1.63–3.05 | 2.32                                                          | 1.04–5.17  | 0.89                                                                          | 0.46–1.71 |
| Any first-degree relative                                             | 1.68                                                        | 1.45–1.95 | 1.62                                              | 1.25–2.09 | 3.25                                                    | 2.04–5.17  | 1.90                                                      | 1.52–2.38 | 2.58                                                          | 1.46–4.55  | 1.05                                                                          | 0.76–1.43 |
| Any second-degree relative                                            | 1.35                                                        | 1.18–1.54 | 1.31                                              | 1.06–1.62 | 1.15                                                    | 0.67–1.99  | 1.30                                                      | 1.08–1.57 | 1.97                                                          | 1.16–3.33  | 1.49                                                                          | 1.21–1.84 |
| Any third-degree relative                                             | 1.39                                                        | 1.10–1.77 | 2.22                                              | 1.22–4.02 | 3.70                                                    | 0.52–26.32 | 1.07                                                      | 0.44–2.58 | -                                                             | -          | 1.29                                                                          | 1.00–1.68 |
| Any first-deg female relative                                         | 1.58                                                        | 1.32–1.90 | 1.73                                              | 1.26–2.37 | 3.04                                                    | 1.63–5.66  | 1.65                                                      | 1.21–2.23 | 2.88                                                          | 1.29–6.42  | 1.12                                                                          | 0.80–1.59 |
| Any first-deg male realtive                                           | 1.62                                                        | 1.33–1.97 | 1.44                                              | 0.98–2.10 | 3.21                                                    | 1.61–6.44  | 2.27                                                      | 1.68–3.06 | 2.17                                                          | 0.97–4.84  | 0.88                                                                          | 0.57–1.34 |
| <b>Proband mothers with prior psychiatric history <sup>b</sup></b>    |                                                             |           |                                                   |           |                                                         |            |                                                           |           |                                                               |            |                                                                               |           |
| Mother                                                                | 1.37                                                        | 1.16–1.63 | 1.25                                              | 0.91–1.73 | 1.71                                                    | 0.81–3.58  | 1.58                                                      | 1.21–2.07 | 2.02                                                          | 0.96–4.24  | 1.06                                                                          | 0.76–1.48 |
| Father                                                                | 1.30                                                        | 1.05–1.61 | 1.33                                              | 0.92–1.94 | 2.67                                                    | 1.20–5.96  | 1.15                                                      | 0.78–1.70 | 1.63                                                          | 0.73–3.63  | 1.15                                                                          | 0.75–1.76 |
| Any first-degree relative                                             | 1.29                                                        | 1.12–1.48 | 1.17                                              | 0.92–1.50 | 2.12                                                    | 1.25–3.59  | 1.40                                                      | 1.12–1.74 | 1.89                                                          | 1.12–3.20  | 1.03                                                                          | 0.81–1.29 |
| Any second-degree relative                                            | 1.06                                                        | 0.93–1.22 | 0.87                                              | 0.69–1.09 | 0.89                                                    | 0.48–1.67  | 1.15                                                      | 0.95–1.38 | 1.16                                                          | 0.64–2.11  | 1.13                                                                          | 0.93–1.37 |
| Any third-degree relative                                             | 1.33                                                        | 1.07–1.65 | 1.62                                              | 0.89–2.95 | -                                                       | -          | 1.88                                                      | 1.06–3.33 | 1.52                                                          | 0.21–10.84 | 1.26                                                                          | 1.00–1.59 |
| Any first-deg female relative                                         | 1.27                                                        | 1.08–1.49 | 1.06                                              | 0.77–1.47 | 1.83                                                    | 0.91–3.67  | 1.55                                                      | 1.20–2.01 | 2.14                                                          | 1.07–4.29  | 0.98                                                                          | 0.75–1.27 |
| Any first-deg male realtive                                           | 1.12                                                        | 0.92–1.35 | 1.09                                              | 0.76–1.58 | 2.79                                                    | 1.33–5.87  | 1.10                                                      | 0.76–1.59 | 1.77                                                          | 0.84–3.72  | 0.98                                                                          | 0.73–1.31 |

Figures are hazard ratios (95% confidence intervals); <sup>a</sup> adjusted for calendar year at delivery and age at delivery and stratified by previous psychiatric history of the proband mothers ; <sup>b</sup> adjusted for calendar year at delivery and age at delivery.

**FIGURE S1.** Definition of relatives according to proband new mothers.

| Definition of relatives according to proband mothers |                       | 1 <sup>st</sup> degree relatives (a=0.5) | 2 <sup>nd</sup> degree relatives (a=0.25) | 3 <sup>rd</sup> degree relatives (a=0.125) |
|------------------------------------------------------|-----------------------|------------------------------------------|-------------------------------------------|--------------------------------------------|
| Generation                                           |                       |                                          | Grandparents                              |                                            |
| Generation                                           |                       | Parents                                  | Uncles/aunts                              |                                            |
| Generation                                           | <b>Proband mother</b> | Full siblings                            | Half siblings                             | First Cousins                              |

a=additive genetic coefficient of relationship
